# Supplementary material for: Sources of Added Sugars in Young Children, Adolescents, and Adults with Low and High Intakes of Added Sugars
Source: PubMed Central journal article supplement (PMC5793330; doi:10.3390/nu10010102), 2018-01-17
Supplement: nutrients-10-00102-s001.pdf [file nutrients-10-00102-s001.pdf]

## Appendix A: Supplemental Tables

**Table S1.** Top Ten Food Sources of Added Sugars for Children 2-8 y by Ten Deciles of Intake<sup>1</sup>

| Rank | Decile 1                     |                      | Decile 2                |                      | Decile 3                |                      | Decile 4                     |                      | Decile 5                     |                      | Decile 6                     |                      | Decile 7                     |                      | Decile 8                 |                      | Decile 9                 |                      | Decile 10                    |                      |
|------|------------------------------|----------------------|-------------------------|----------------------|-------------------------|----------------------|------------------------------|----------------------|------------------------------|----------------------|------------------------------|----------------------|------------------------------|----------------------|--------------------------|----------------------|--------------------------|----------------------|------------------------------|----------------------|
|      | Food Sub Group               | % Total Added Sugars | Food Sub Group          | % Total Added Sugars | Food Sub Group          | % Total Added Sugars | Food Sub Group               | % Total Added Sugars | Food Sub Group               | % Total Added Sugars | Food Sub Group               | % Total Added Sugars | Food Sub Group               | % Total Added Sugars | Food Sub Group           | % Total Added Sugars | Food Sub Group           | % Total Added Sugars | Food Sub Group               | % Total Added Sugars |
| 1    | RTE Cereals                  | 14.8 ± 1.00          | Sweetened Beverages     | 16.6 ± 1.94          | Sweet Bakery Products   | 15.2 ± 1.95          | Sweetened Beverages          | 17.3 ± 1.83          | Sweetened Beverages          | 22.8 ± 2.18          | Sweetened Beverages          | 25.2 ± 2.94          | Sweetened Beverages          | 31.1 ± 2.57          | Sweetened Beverages      | 29.0 ± 2.49          | Sweetened Beverages      | 33.4 ± 2.14          | Sweetened Beverages          | 36.8 ± 2.44          |
| 2    | Sweet Bakery Products        | 14.7 ± 1.69          | Sweet Bakery Products   | 12.7 ± 1.38          | Sweetened Beverages     | 14.8 ± 2.11          | Sweet Bakery Products        | 14.1 ± 1.81          | Sweet Bakery Products        | 16.1 ± 2.03          | Flavored Milk                | 12.6 ± 1.80          | Sweet Bakery Products        | 12.1 ± 1.16          | Sweet Bakery Products    | 16.6 ± 1.64          | Sweet Bakery Products    | 14.9 ± 1.69          | Sweet Bakery Products        | 14.3 ± 1.58          |
| 3    | Sweetened Beverages          | 12.4 ± 2.14          | RTE Cereals             | 12.5 ± 1.47          | RTE Cereals             | 11.1 ± 2.21          | RTE Cereals                  | 12.9 ± 1.43          | Other Desserts               | 8.8 ± 1.69           | Sweet Bakery Products        | 11.9 ± 1.62          | Other Desserts               | 8.2 ± 1.12           | Other Desserts           | 7.5 ± 1.71           | Other Desserts           | 8.5 ± 1.39           | Candy                        | 9.1 ± 1.48           |
| 4    | Other Dessert                | 7.7 ± 1.51           | Other Desserts          | 8.1 ± 1.09           | Flavored Milk           | 7.8 ± 1.61           | Flavored Milk                | 8.8 ± 1.66           | Flavored Milk                | 7.7 ± 1.71           | RTE Cereals                  | 10.4 ± 1.37          | Flavored Milk                | 8.1 ± 1.01           | Candy                    | 7.5 ± 1.24           | Sugars                   | 7.4 ± 3.25           | Other Desserts               | 7.6 ± 1.08           |
| 5    | Breads, Rolls, Tortillas     | 7.3 ± 1.16           | Yogurt                  | 6.8 ± 1.27           | Other Desserts          | 7.3 ± 1.35           | Other Desserts               | 8.8 ± 1.39           | RTE Cereals                  | 6.5 ± 0.96           | Other Desserts               | 6.3 ± 1.41           | Candy                        | 7.4 ± 1.18           | Flavored Milk            | 7.3 ± 0.98           | Candy                    | 7.1 ± 1.31           | Flavored Milk                | 5.7 ± 0.98           |
| 6    | Sugars                       | 6.6 ± 1.03           | Sugars                  | 6.0 ± 0.89           | Sugars                  | 6.8 ± 1.17           | Sugars                       | 5.3 ± 0.93           | Candy                        | 6.3 ± 1.19           | Candy                        | 6.2 ± 0.91           | RTE Cereals                  | 7.3 ± 0.96           | RTE Cereals              | 6.6 ± 0.83           | Flavored Milk            | 6.0 ± 0.94           | Sugars                       | 4.8 ± 0.63           |
| 7    | Candy                        | 5.4 ± 1.16           | Candy                   | 5.7 ± 0.94           | Yogurt                  | 5.2 ± 1.51           | Yogurt                       | 4.6 ± 1.37           | Sugars                       | 5.9 ± 1.55           | Sugars                       | 4.0 ± 0.66           | Sugars                       | 5.0 ± 1.06           | Sugars                   | 6.4 ± 1.04           | RTE Cereals              | 5.8 ± 0.75           | RTE Cereals                  | 4.3 ± 0.68           |
| 8    | Yogurt                       | 4.2 ± 1.47           | Bread, Rolls, Tortillas | 4.8 ± 0.60           | Bread, Rolls, Tortillas | 4.7 ± 0.62           | Candy                        | 4.4 ± 0.80           | Yogurt                       | 5.5 ± 1.03           | Coffee, Tea                  | 3.1 ± 1.37           | Breads, Rolls, Tortillas     | 2.8 ± 0.28           | Yogurt                   | 2.4 ± 0.93           | Yogurt                   | 2.4 ± 0.68           | Coffee, Tea                  | 3.3 ± 1.79           |
| 9    | Quick Breads, Bread Products | 3.4 ± 0.58           | Flavored Milk           | 3.6 ± 0.70           | Candy                   | 4.3 ± 0.97           | Quick Breads, Bread Products | 3.7 ± 1.48           | Breads, Rolls, Tortillas     | 3.0 ± 0.47           | Quick Breads, Bread Products | 2.8 ± 1.04           | Yogurt                       | 2.5 ± 0.76           | Breads, Rolls, Tortillas | 2.2 ± 0.22           | Breads, Rolls, Tortillas | 1.9 ± 0.24           | Yogurt                       | 2.6 ± 1.02           |
| 10   | Snack/Meal Bars              | 3.1 ± 0.92           | Fruits                  | 3.4 ± 0.85           | Fruits                  | 3.1 ± 0.82           | Bread, Rolls, Tortillas      | 3.1 ± 0.30           | Quick Breads, Bread Products | 2.6 ± 0.61           | Breads, Rolls, Tortillas     | 2.4 ± 0.24           | Quick Breads, Bread Products | 2.0 ± 0.41           | Coffee, Tea              | 2.0 ± 0.69           | Coffee, Tea              | 1.7 ± 0.49           | Quick Breads, Bread Products | 1.8 ± 0.51           |

<sup>1</sup>Mean ± standard error

**Table S2.** Top Ten Food Sources of Added Sugars for Children and Adolescents 9-18 y by Ten Deciles of Intake<sup>1</sup>

| Ran | Decile 1                 |               | Decile 2                 |               | Decile 3                 |               | Decile 4                   |               | Decile 5                        |               | Decile 6                     |               | Decile 7                     |               | Decile 8                 |               | Decile 9                     |               | Decile 10                       |               |
|-----|--------------------------|---------------|--------------------------|---------------|--------------------------|---------------|----------------------------|---------------|---------------------------------|---------------|------------------------------|---------------|------------------------------|---------------|--------------------------|---------------|------------------------------|---------------|---------------------------------|---------------|
| k   | Food Sub Group           | % Total Added | Food Sub Group           | % Total Added | Food Sub Group           | % Total Added | Food Sub Group             | % Total Added | Food Sub Group                  | % Total Added | Food Sub Group               | % Total Added | Food Sub Group               | % Total Added | Food Sub Group           | % Total Added | Food Sub Group               | % Total Added | Food Sub Group                  | % Total Added |
| 1   | Ready-to-Eat Cereals     | 12.5 ± 2.44   | Sweetened Beverages      | 27.4 ± 3.89   | Sweetened Beverages      | 32.8 ± 2.77   | Sweetened Beverages        | 30.1 ± 2.37   | Sweetened Beverages             | 33.1 ± 2.74   | Sweetened Beverages          | 40.1 ± 2.77   | Sweetened Beverages          | 38.3 ± 2.66   | Sweetened Beverages      | 44.2 ± 2.36   | Sweetened Beverages          | 41.3 ± 2.28   | Sweetened Beverages             | 53.3 ± 1.74   |
| 2   | Sweetened Beverages      | 12.3 ± 1.41   | Sweet Bakery Products    | 12.3 ± 1.81   | Sweet Bakery Products    | 11.8 ± 1.53   | Sweet Bakery Products      | 13.7 ± 2.12   | Sweet Bakery Products           | 9.4 ± 1.55    | Sweet Bakery Products        | 10.4 ± 1.07   | Sweet Bakery Products        | 13.9 ± 1.67   | Sweet Bakery Products    | 13.7 ± 1.93   | Sweet Bakery Products        | 14.1 ± 1.37   | Sweet Bakery Products           | 11.4 ± 1.08   |
| 3   | Breads, Rolls, Tortillas | 10.4 ± 1.66   | Ready-to-Eat Cereals     | 10.5 ± 1.73   | Ready-to-Eat Cereals     | 7.8 ± 1.04    | Other Desserts             | 10.3 ± 1.92   | Other Desserts                  | 7.1 ± 1.69    | Sugars                       | 7.3 ± 2.51    | Other Desserts               | 7.7 ± 1.32    | Coffee, Tea              | 6.2 ± 1.21    | Coffee, Tea                  | 6.6 ± 1.22    | Candy                           | 5.6 ± 1.06    |
| 4   | Sweet Bakery Products    | 8.0 ± 1.03    | Candy                    | 7.9 ± 2.04    | Flavored Milk            | 6.2 ± 1.63    | Ready-to-Eat Cereals       | 9.0 ± 1.26    | Sugars                          | 6.7 ± 3.43    | Other Desserts               | 5.6 ± 1.31    | Ready-to-Eat Cereals         | 6.4 ± 0.85    | Other Desserts           | 6.0 ± 1.19    | Candy                        | 6.2 ± 1.44    | Other Desserts                  | 5.5 ± 0.80    |
| 5   | Mixed Dishes – Pizza     | 6.7 ± 1.73    | Flavored Milk            | 4.7 ± 1.41    | Candy                    | 6.0 ± 1.40    | Coffee, Tea                | 5.5 ± 1.33    | Ready-to-Eat Cereals            | 6.1 ± 1.19    | Ready-to-Eat Cereals         | 5.3 ± 0.87    | Candy                        | 6.0 ± 1.26    | Candy                    | 5.5 ± 0.78    | Other Desserts               | 6.1 ± 1.33    | Coffee and Tea                  | 4.9 ± 1.24    |
| 6   | Flavored Milk            | 6.3 ± 1.61    | Breads, Rolls, Tortillas | 4.6 ± 0.75    | Other Desserts           | 5.3 ± 1.09    | Candy                      | 5.3 ± 1.12    | Coffee and Tea                  | 5.9 ± 2.10    | Candy                        | 4.8 ± 0.83    | Coffee, Tea                  | 6.0 ± 1.63    | Ready-to-Eat Cereals     | 4.5 ± 0.57    | Sugars                       | 5.2 ± 0.92    | Ready-to-Eat Cereals            | 4.7 ± 1.00    |
| 7   | Other Desserts           | 5.6 ± 1.40    | Sugars                   | 4.5 ± 1.16    | Breads, Rolls, Tortillas | 4.8 ± 0.71    | Breads, Rolls, Tortillas   | 3.2 ± 0.27    | Candy                           | 4.2 ± 0.95    | Coffee, Tea                  | 4.6 ± 1.07    | Sugars                       | 4.7 ± 0.73    | Sugars                   | 3.8 ± 0.68    | Ready-to-Eat Cereals         | 4.0 ± 0.66    | Sugars                          | 3.1 ± 0.53    |
| 8   | Candy                    | 5.2 ± 1.12    | Other Desserts           | 4.4 ± 0.78    | Sugars                   | 3.2 ± 0.66    | Dairy Drinks & Substitutes | 2.8 ± 1.31    | Breads, Rolls, Tortillas        | 4.0 ± 0.88    | Flavored Milk                | 4.4 ± 1.07    | Flavored Milk                | 4.5 ± 1.05    | Flavored Milk            | 3.3 ± 0.79    | Flavored Milk                | 1.9 ± 0.38    | Flavored Milk                   | 1.5 ± 0.32    |
| 9   | Sugars                   | 4.5 ± 1.07    | Coffee, Tea              | 3.2 ± 1.05    | Mixed Dishes-Sandwiches  | 3.1 ± 0.92    | Flavored Milk              | 2.4 ± 0.65    | Flavored Milk                   | 3.9 ± 0.72    | Quick Breads, Bread Products | 2.7 ± 0.71    | Breads, Rolls, Tortillas     | 2.2 ± 0.19    | Breads, Rolls, Tortillas | 1.8 ± 0.23    | Quick Breads, Bread Products | 1.9 ± 0.49    | Breads, Rolls, Tortillas        | 1.4 ± 0.19    |
| 10  | Coffee, Tea              | 4.1 ± 1.21    | Mixed Dishes-Pizza       | 2.7 ± 0.87    | Mixed Dishes-Pizza       | 2.8 ± 0.82    | Sugars                     | 2.2 ± 0.52    | Quick Breads and Bread Products | 3.5 ± 0.77    | Breads, Rolls, Tortillas     | 2.4 ± 0.24    | Quick Breads, Bread Products | 2.1 ± 0.38    | Condiments, Sauces       | 1.5 ± 0.19    | Breads, Rolls, Tortillas     | 1.8 ± 0.18    | Quick Breads and Bread Products | 1.2 ± 0.44    |

<sup>1</sup>Mean ± standard error

**Table S3.** Top Ten Food Sources of Added Sugars for Adults ≥ 19 y by Ten Deciles of Intake<sup>1</sup>

| Rank | Decile 1                  |                      | Decile 2                     |                      | Decile 3                     |                      | Decile 4                 |                      | Decile 5                 |                      | Decile 6                 |                      | Decile 7                     |                      | Decile 8                     |                      | Decile 9                     |                      | Decile 10                       |                      |
|------|---------------------------|----------------------|------------------------------|----------------------|------------------------------|----------------------|--------------------------|----------------------|--------------------------|----------------------|--------------------------|----------------------|------------------------------|----------------------|------------------------------|----------------------|------------------------------|----------------------|---------------------------------|----------------------|
|      | Food Sub Group            | % Total Added Sugars | Food Sub Group               | % Total Added Sugars | Food Sub Group               | % Total Added Sugars | Food Sub Group           | % Total Added Sugars | Food Sub Group           | % Total Added Sugars | Food Sub Group           | % Total Added Sugars | Food Sub Group               | % Total Added Sugars | Food Sub Group               | % Total Added Sugars | Food Sub Group               | % Total Added Sugars | Food Sub Group                  | % Total Added Sugars |
| 1    | Breads, Rolls, Tortillas  | 20.04 ± 0.91         | Sweet Bakery Products        | 13.3 ± 1.29          | Sweet Bakery Products        | 13.9 ± 1.20          | Sweet Bakery Products    | 17.00 ± 1.11         | Sweetened Beverages      | 23.05 ± 1.38         | Sweetened Beverages      | 24.25 ± 1.83         | Sweetened Beverages          | 30.84 ± 1.51         | Sweetened Beverages          | 38.7 ± 1.83          | Sweetened Beverages          | 45.3 ± 1.27          | Sweetened Beverages             | 51.4 ± 1.50          |
| 2    | Sweet Bakery Products     | 10.37 ± 0.92         | Breads, Rolls, Tortillas     | 12.6 ± 1.18          | Sweetened Beverages          | 11.3 ± 0.97          | Sweetened Beverages      | 16.8 ± 1.61          | Sweet Bakery Products    | 13.9 ± 1.14          | Sweet Bakery Products    | 15.1 ± 0.88          | Sweet Bakery Products        | 14.5 ± 0.91          | Sweet Bakery Products        | 12.6 ± 0.84          | Sweet Bakery Products        | 12.7 ± 0.94          | Coffee and Tea                  | 10.6 ± 0.96          |
| 3    | Fats and Oils             | 9.7 ± 0.94           | Sweetened Beverages          | 8.7 ± 1.12           | Sugars                       | 8.9 ± 0.57           | Sugars                   | 8.1 ± 0.67           | Sugars                   | 9.5 ± 0.60           | Other Desserts           | 8.2 ± 1.29           | Sugars                       | 7.9 ± 0.97           | Coffee, Tea                  | 9.0 ± 1.36           | Sugars                       | 7.1 ± 0.75           | Sweet Bakery Products           | 9.5 ± 0.58           |
| 4    | Ready-to-Eat Cereals      | 7.2 ± 0.95           | Sugars                       | 8.6 ± 1.01           | Breads, Rolls, Tortillas     | 8.4 ± 0.62           | Candy                    | 7.8 ± 0.99           | Other Desserts           | 6.8 ± 0.96           | Sugars                   | 7.9 ± 0.77           | Other Desserts               | 7.7 ± 1.07           | Sugars                       | 7.9 ± 0.66           | Coffee, Tea                  | 6.7 ± 0.70           | Sugars                          | 6.4 ± 0.38           |
| 5    | Sugars                    | 5.8 ± 0.80           | Ready-to-Eat Cereals         | 7.9 ± 0.95           | Candy                        | 7.1 ± 0.84           | Other Desserts           | 7.0 ± 0.79           | Candy                    | 6.6 ± 0.85           | Coffee, Tea              | 6.4 ± 1.04           | Candy                        | 6.4 ± 0.98           | Candy                        | 5.4 ± 0.78           | Other Desserts               | 4.7 ± 0.53           | Candy                           | 4.8 ± 0.44           |
| 6    | Candy                     | 5.5 ± 1.05           | Fats and Oils                | 6.4 ± 0.90           | Ready-to-Eat Cereals         | 6.7 ± 0.69           | Breads, Rolls, Tortillas | 6.2 ± 0.34           | Coffee, Tea              | 6.1 ± 0.74           | Candy                    | 6.1 ± 0.66           | Coffee, Tea                  | 6.3 ± 0.86           | Other Desserts               | 4.5 ± 0.55           | Candy                        | 4.5 ± 0.30           | Other Desserts                  | 4.5 ± 0.63           |
| 7    | Sweetened Beverages       | 4.4 ± 0.75           | Other Desserts               | 5.7 ± 0.96           | Other Desserts               | 6.1 ± 0.81           | Ready-to-Eat Cereals     | 5.9 ± 0.70           | Breads, Rolls, Tortillas | 5.8 ± 0.46           | Ready-to-Eat Cereals     | 5.3 ± 0.61           | Ready-to-Eat Cereals         | 3.7 ± 0.50           | Ready-to-Eat Cereals         | 3.1 ± 0.46           | Ready-to-Eat Cereals         | 2.8 ± 0.39           | Ready-to-Eat Cereals            | 2.2 ± 0.17           |
| 8    | Condiments and Sauces     | 3.8 ± 0.61           | Candy                        | 5.6 ± 0.62           | Fats and Oils                | 5.2 ± 0.91           | Coffee, Tea              | 4.2 ± 0.69           | Ready-to-Eat Cereals     | 5.3 ± 0.73           | Breads, Rolls, Tortillas | 3.8 ± 0.33           | Breads, Rolls, Tortillas     | 3.2 ± 0.20           | Breads, Rolls, Tortillas     | 2.5 ± 0.21           | Breads, Rolls, Tortillas     | 2.3 ± 0.27           | Fats and Oils                   | 1.2 ± 0.18           |
| 9    | Mixed Dishes - Sandwiches | 3.2 ± 0.69           | Quick Breads, Bread Products | 2.8 ± 0.49           | Coffee, Tea                  | 3.5 ± 0.58           | Fats and Oils            | 3.3 ± 0.28           | Fats and Oils            | 3.4 ± 0.38           | Fats and Oils            | 2.6 ± 0.35           | Fats and Oils                | 2.4 ± 0.25           | Fats and Oils                | 2.0 ± 0.28           | Quick Breads, Bread Products | 1.3 ± 0.17           | Breads, Rolls, Tortillas        | 1.1 ± 0.06           |
| 10   | Cured Meats/Poultry       | 2.8 ± 0.47           | Condiments and Sauces        | 2.8 ± 0.42           | Quick Breads, Bread Products | 3.3 ± 0.68           | Condiments and Sauces    | 1.9 ± 0.29           | Snack/Meal Bars          | 2.0 ± 0.43           | Yogurt                   | 2.6 ± 0.55           | Quick Breads, Bread Products | 1.8 ± 0.26           | Quick Breads, Bread Products | 1.4 ± 0.36           | Fats and Oils                | 1.3 ± 0.21           | Quick Breads and Bread Products | 1.1 ± 0.18           |

<sup>1</sup>Mean ± standard error
